# Supplementary material for: Children With Noncritical Infections Have Increased Intestinal Permeability, Endotoxemia and Altered Innate Immune Responses
Source: PubMed Central journal article supplement (PMC7614937; doi:10.1097/inf.0000000000002311), 2019-07-01
Supplement: EMS184773-supplement-Supplementary_Figures.pdf [file EMS184773-supplement-Supplementary_Figures.pdf]

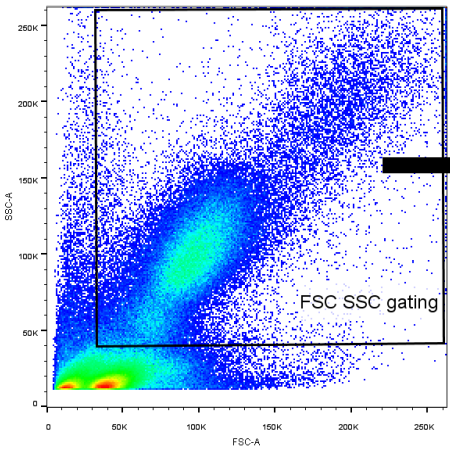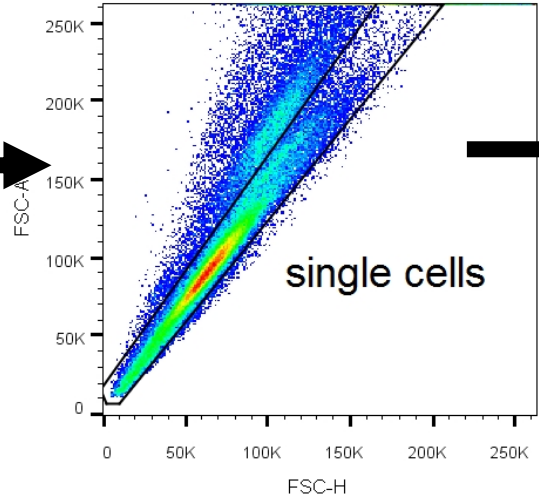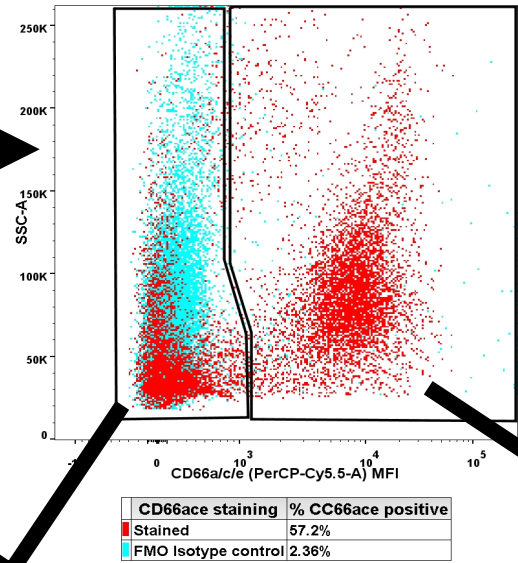

**Monocytes**

**Neutrophils**

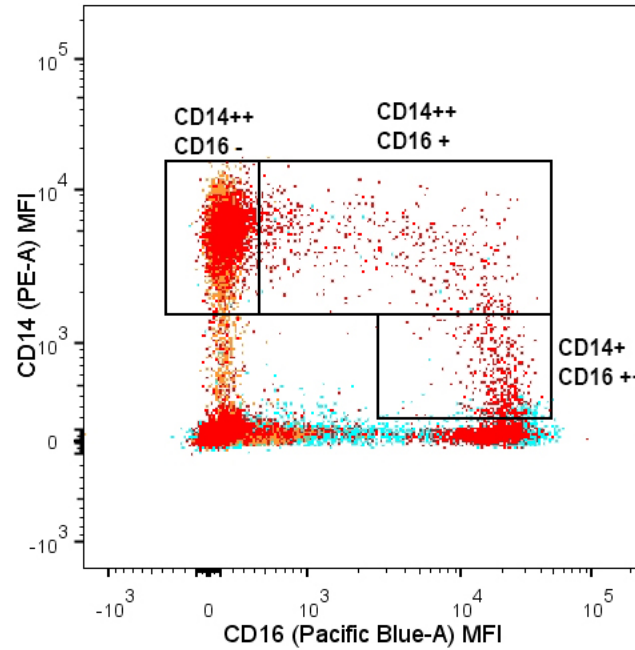

| CD14 (PE) CD16 (Pacific Blue) staining |                          |
|----------------------------------------|--------------------------|
| ■                                      | Fully Stained            |
| ■                                      | FMO Isotype control CD16 |
| ■                                      | FMO Isotype Control CD14 |

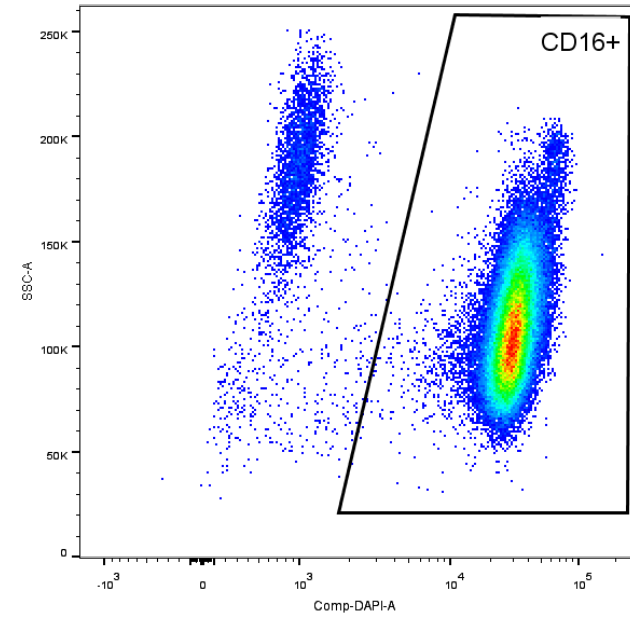

Gating strategy of monocyte/neutrophil populations using FMO isotype controls:

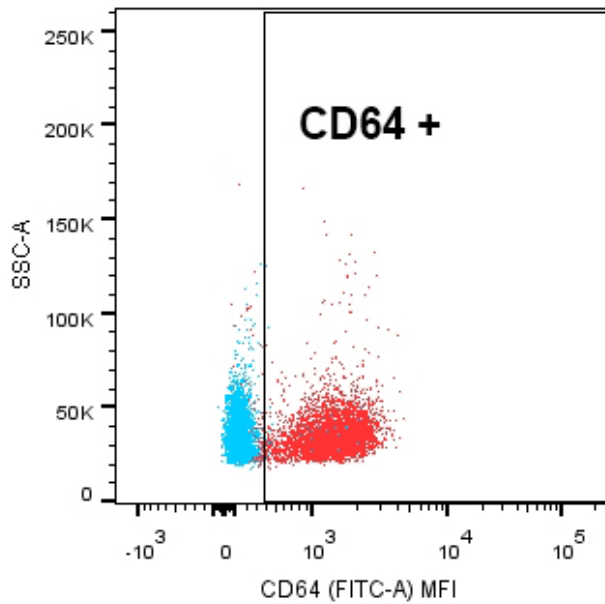

|  | CD64 (FITC) staining | % CD64 +ve |
|--|----------------------|------------|
|  | FMO isotype control  | 0.65%      |
|  | stained sample       | 96.4%      |

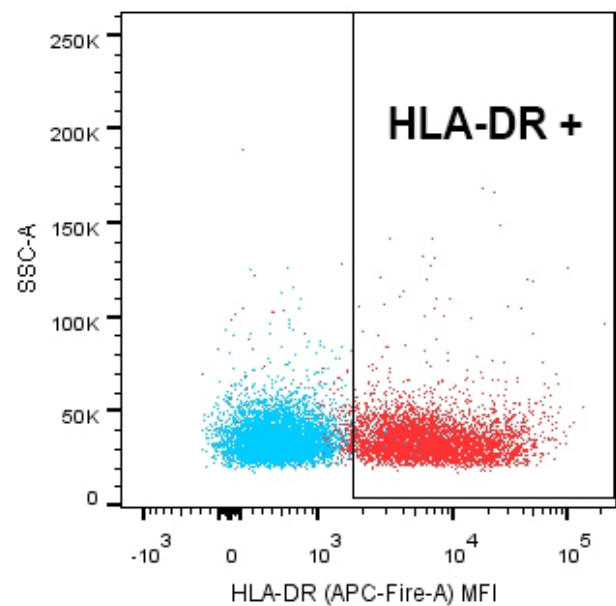

|  | HLA-DR (APC-Fire) staining | % HLA-DR positive |
|--|----------------------------|-------------------|
|  | FMO isotype control        | 0.34%             |
|  | stained sample             | 92.8%             |

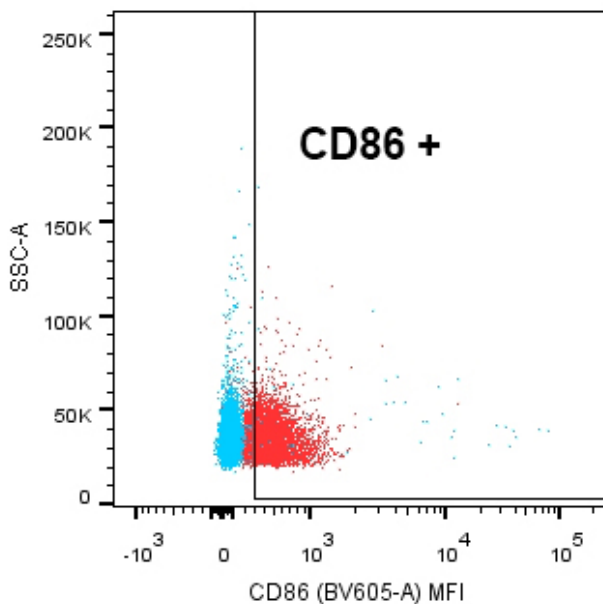

|  | CD86 (BV-605) staining | %CD86 positive |
|--|------------------------|----------------|
|  | FMO isotype control    | 0.73%          |
|  | stained sample         | 67.3%          |

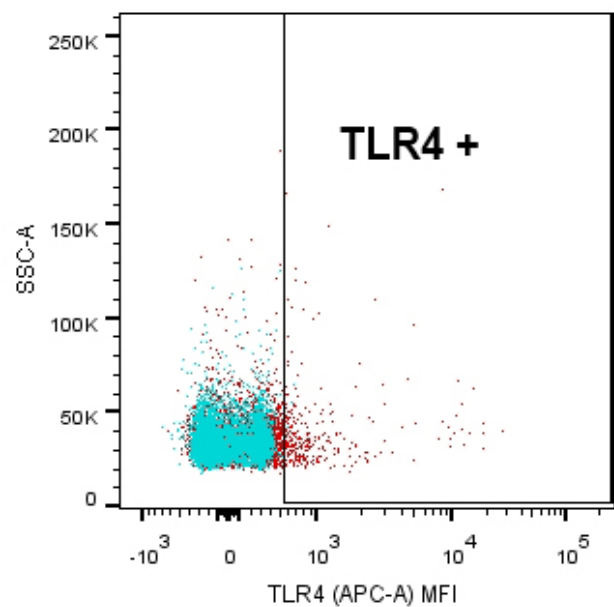

|  | TLR4 (APC) Staining | %TLR4 positive |
|--|---------------------|----------------|
|  | FMO isotype control | 0.15%          |
|  | stained sample      | 4.21%          |
